# Supplementary material for: Identification of the key genes and microRNAs in adult acute myeloid leukemia with FLT3 mutation by bioinformatics analysis
Source: PubMed Central journal article supplement (PMC7294926; doi:10.7150/ijms.46441), 2020-05-18
Supplement: ijmsv17p1269s1.pdf [file ijmsv17p1269s1.pdf]

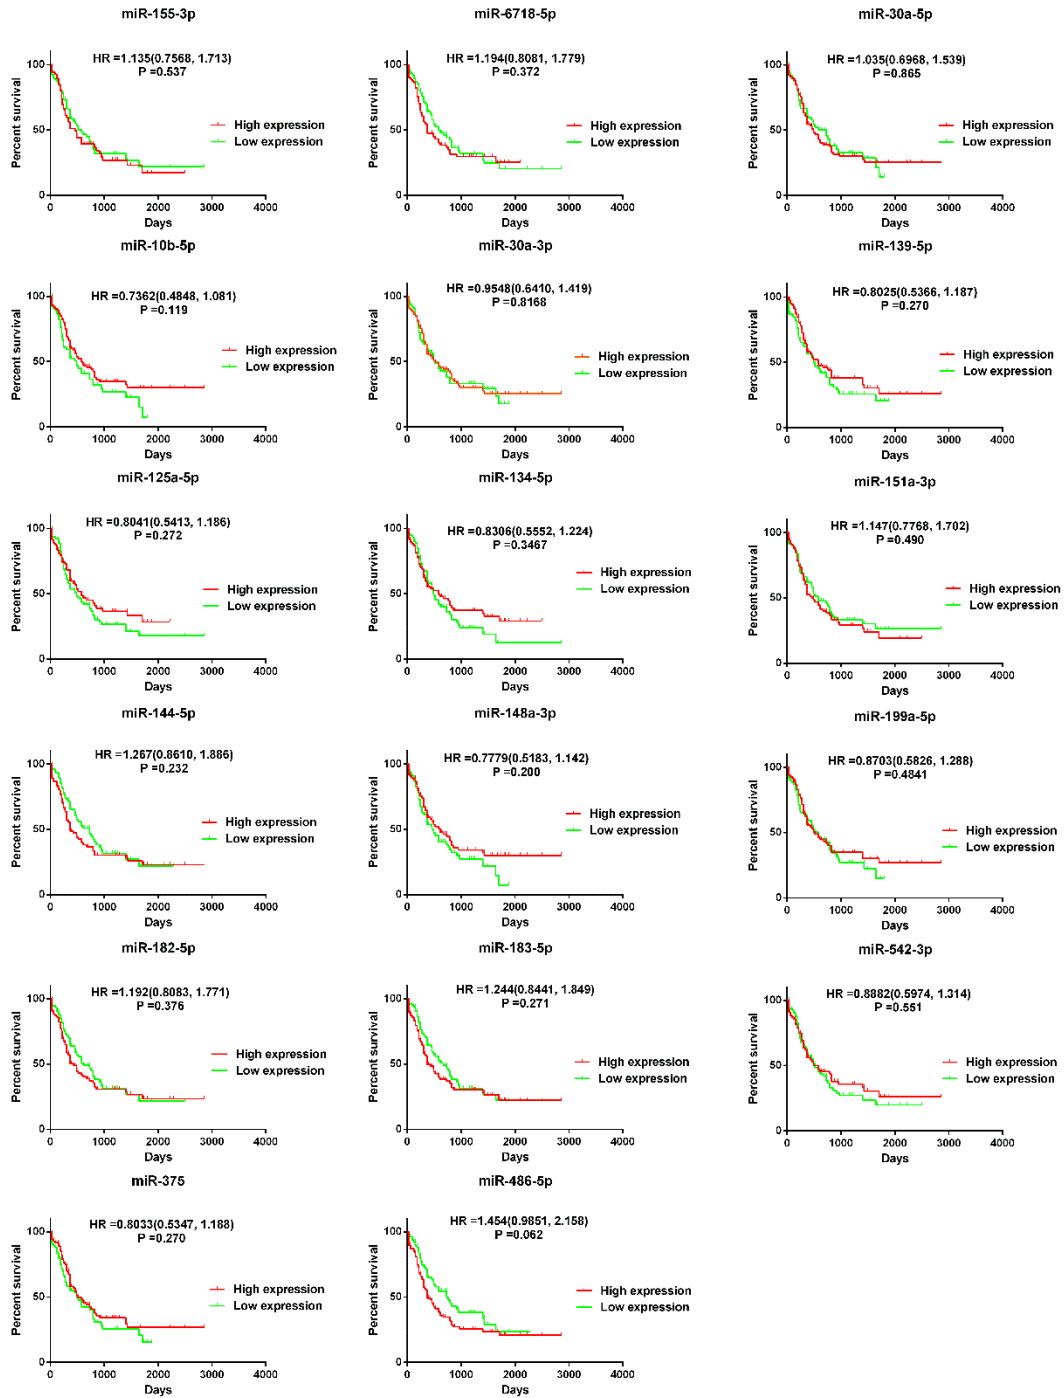

**Figure S1 Prognostic significance of seventeen DE-miRNAs**

Kaplan-Meier survival curves of overall survival (OS) in AML was performed using TCGA dataset. The top 50% miRNA expression was defined as high expression group and the rest was defined as low expression group. The hazard ratio (HR) with 95% confidence intervals (CIs) were analyzed by the Cox proportional hazards regression model. Seventeen miRNAs had no statistical difference in survival analyses.

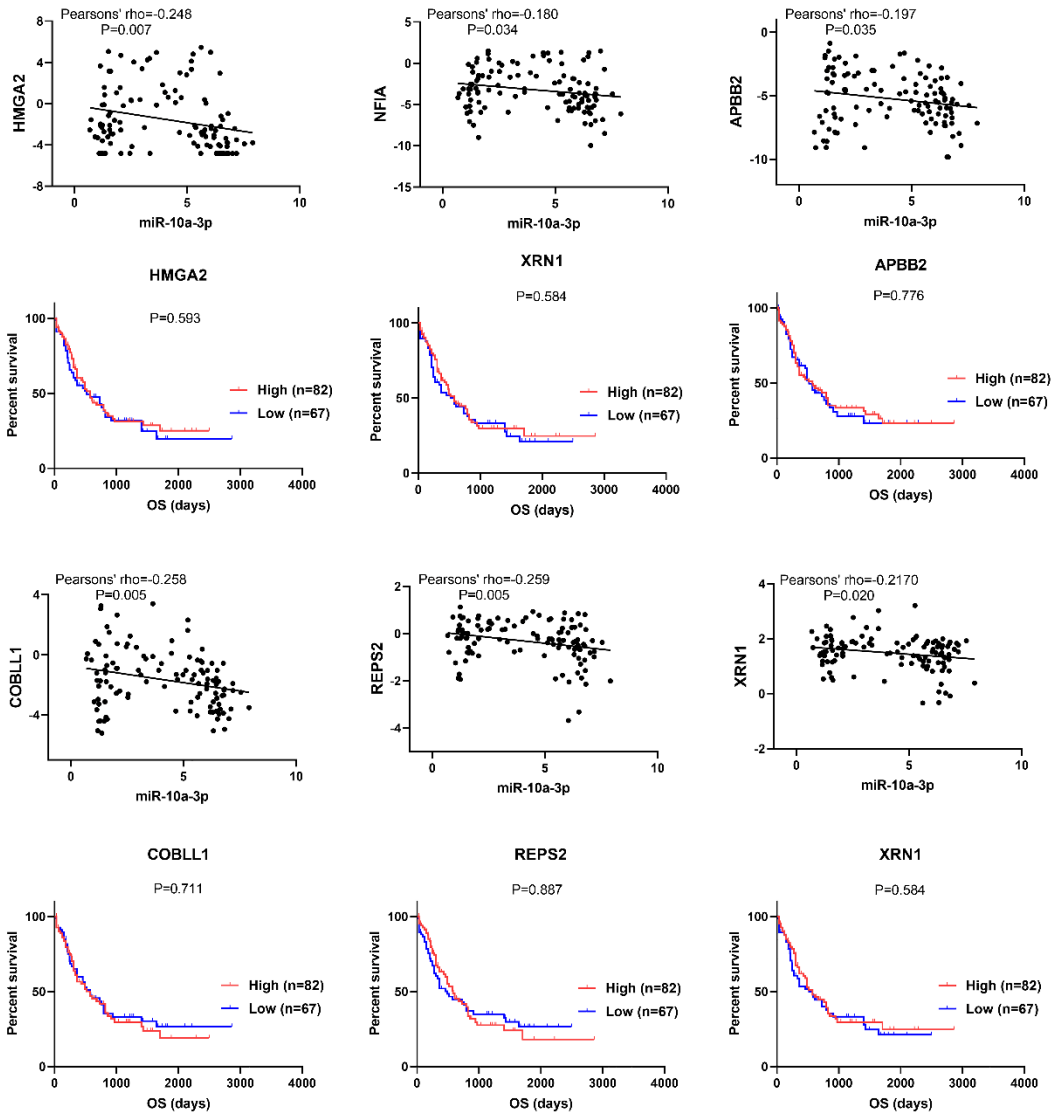

**Figure S2 Survival analyses of six target genes negative correlated with miR-10a-3p**

Kaplan-Meier survival curves of overall survival (OS) in AML was performed using TCGA dataset.

**Table S1 Differentially expressed genes and miRNAs form TCGA dataset**

| Type  | Upregulated                                                                                                                                                                                                                                                                                                                                                                                                                        | Downregulated                                                                                                                                                                                                                                                                                                                                                                                                                                                                                                                                                                                                                                                                                                                                                                                                                                                                                                                                                                                                                                                                                                                                                                                                                                                                                                                                                                                                                                                            |
|-------|------------------------------------------------------------------------------------------------------------------------------------------------------------------------------------------------------------------------------------------------------------------------------------------------------------------------------------------------------------------------------------------------------------------------------------|--------------------------------------------------------------------------------------------------------------------------------------------------------------------------------------------------------------------------------------------------------------------------------------------------------------------------------------------------------------------------------------------------------------------------------------------------------------------------------------------------------------------------------------------------------------------------------------------------------------------------------------------------------------------------------------------------------------------------------------------------------------------------------------------------------------------------------------------------------------------------------------------------------------------------------------------------------------------------------------------------------------------------------------------------------------------------------------------------------------------------------------------------------------------------------------------------------------------------------------------------------------------------------------------------------------------------------------------------------------------------------------------------------------------------------------------------------------------------|
| miRNA | miR-1-3p, miR-10a-3p, miR-10a-5p, miR-133a-3p, miR-155-3p, miR-6718-5p<br>(n=6)                                                                                                                                                                                                                                                                                                                                                    | miR-148a-3p, miR-199a-5p, miR-10b-5p, miR-182-5p, miR-139-5p, miR-486-5p, miR-30a-3p, miR-30a-5p, miR-183-5p, miR-144-5p, miR-99b-5p, miR-125a-5p, miR-542-3p, miR-598-3p, miR-151a-3p, miR-375, miR-151a-5p, miR-134-5p<br>(n=18)                                                                                                                                                                                                                                                                                                                                                                                                                                                                                                                                                                                                                                                                                                                                                                                                                                                                                                                                                                                                                                                                                                                                                                                                                                       |
| mRNA  | NKX2-3, PRDM16, GTSF1, COL4A5, FLJ42875, HOXB6, C20orf200, FAM47E, CT45A1, GLI2, APOC2, HOXB3, LGALS3BP, AGXT, HOXB5, CCL1, HOXB4, WNT7B, CCNA1, CT45A3, LOC728606, ADRB1, HOXA6, IRX3, C6orf97, CYSLTR2, HOXA5, H2AFY2, JPH1, ADCY2, KRT17, HOXA4, SAGE1, TOM1L1, FAM124A, DAPL1, C10orf140, IGSF10, VENTX, BEND6, SCHIP1, NLRP2, HOXA3, C20orf54, LCT, APOL4, ANO7, HOXA11AS, MACC1, S100A1, IRX5, HOXA11, MATN4, PI15<br>(n=54) | CXCL12, PXDN, TSPAN7, CHRDL1, FAM171A1, TRH, VCAM1, KIRREL, ZNF521, ADAMTS3, LAMC1, HBA1, COL1A2, FAM64A, DSG2, PKLR, SLCO5A1, COL3A1, MYEF2, CD5L, MXRA5, SNORD116-4, MYCT1, AHSP, HBA2, DCN, HBB, GYPA, DLGAP2, IPW, PBX1, CDC42BPA, C7, APP, FSTL1, TMEM56, ARPP21, ALAS2, SLC4A1, THY1, LTF, PAWR, THSD7A, CYYR1, MCF2L, FGD5, CHL1, GNG11, COL6A3, SVEP1, SNORD116-28, AMPD1, LRP6, GJA1, PROM1, ADAMTS10, APOE, NRP1, PAR-SN, FMO2, HBG2, SEMA6D, LIFR, TEAD1, C10orf58, FRZB, TMIGD2, BGN, RAB3IL1, DNASE1L3, CD34, CCDC80, SNRPN, PTPRD, PCDH18, SDC1, COL1A1, NRP2, ADAMTS9, SLC4A4, CDH11, IGF2, CA1, DLK1, EPB42, PAR5, ZNF626, VGLL3, GPR173, C1QB, ACHE, ALPL, NFATC4, TUSC1, EFEMP1, A2M, SPP1, BAALC, IGFBP5, ATP1B2, FABP4, PARD3, CCL14, SNORD116-20, SDK2, SHD, KIAA1217, C1QTNF1, GLI3, GFRA1, ADD2, TF, C17orf28, LGMN, DLL1, APLNR, HMGA2, FER1L4, LBP, PTPRM, TCTEX1D1, CTGF, ABCG2, APOB, PLEKHH2, GYPB, IKZF2, APBA1, HBG1, PTK2, SELENBP1, PKP2, FBLN5, UGT2B11, PLS3, FMOD, SALL2, NTRK2, TIMP3, ESM1, NFIB, ISLR, LOC96610, SLC22A17, SOX6, HPGDS, FRMD6, MLLT3, ADAM6, SLC22A3, KLF12, CCDC8, GSTT1, NECAB1, FBLN1, TMEM98, PLSCR4, KRT1, ZNF667, COL14A1, ABCA8, NLGN4X, HBM, FAM178B, ZNF704, PLOD2, ENPEP, SEC14L4, CDH5, EYA1, AASS, C1orf21, DAAM2, DLG3, HEMGN, NEDD4L, FLJ22536, RHCE, COL6A2, FMO3, PRKG2, SASH1, TMEM132C, SLCO2B1, WFS1, RAI14, TRAT1, TIAM1, HDGFRP3, MOCS1, LRRC2, TMEM108, PEAR1, MYL4, FBXO39, CTTN<br>(n=196) |

**Table S2 The top 20 hub genes detected by 12 different algorithms in cytoHubba plugin**

| Rank | algorithms  |            |           |                        |        |          |              |        |        |        |           |        |
|------|-------------|------------|-----------|------------------------|--------|----------|--------------|--------|--------|--------|-----------|--------|
|      | Betweenness | BottleNeck | Closeness | Clustering Coefficient | Degree | DMNC     | EcCentricity | EPC    | MCC    | MNC    | Radiality | Stress |
| 1    | CD34        | CD34       | SPP1      | CHRD1                  | APP    | CHRD1    | AHSP         | COL1A2 | IGFBP5 | COL1A1 | CD34      | CD34   |
| 2    | APP         | APP        | COL1A1    | DSG2                   | COL1A1 | WFS1     | HBA1         | COL1A1 | SPP1   | SPP1   | SPP1      | GYPA   |
| 3    | CXCL12      | HBB        | CD34      | LRRC2                  | SPP1   | HBM      | HBB          | SPP1   | FSTL1  | APP    | THY1      | HEMGN  |
| 4    | COL1A1      | CXCL12     | CXCL12    | SOX6                   | COL1A2 | COL14A1  | GYPA         | COL3A1 | LAMC1  | COL1A2 | CXCL12    | APP    |
| 5    | GYPA        | COL1A2     | APP       | IRX5                   | COL3A1 | HOXB5    | GYPB         | BGN    | APP    | COL3A1 | COL1A1    | GTSF1  |
| 6    | GJA1        | HOXB6      | THY1      | SLC22A3                | CXCL12 | HBG1     | ALAS2        | DCN    | APOE   | BGN    | IGF2      | THY1   |
| 7    | ADCY2       | IGF2       | COL1A2    | MATN4                  | CD34   | HBG2     | SLC4A1       | APP    | APOB   | CXCL12 | APP       | CXCL12 |
| 8    | COL3A1      | PBX1       | COL3A1    | RHCE                   | BGN    | HOXB3    | EPB42        | CXCL12 | TF     | DCN    | COL1A2    | HBB    |
| 9    | PBX1        | ADCY2      | BGN       | CCDC80                 | DCN    | COL6A2   | HBG1         | THY1   | WFS1   | THY1   | BGN       | COL1A1 |
| 10   | HEMGN       | SPP1       | IGF2      | HOXA4                  | THY1   | TF       | HOXB6        | IGFBP5 | CHRD1  | CTGF   | FSTL1     | ALAS2  |
| 11   | IGF2        | COL3A1     | CTGF      | MXRA5                  | CTGF   | HOXB6    | HBG2         | CD34   | COL1A2 | IGFBP5 | CTGF      | SPP1   |
| 12   | SPP1        | ALAS2      | FSTL1     | SNRPN                  | IGFBP5 | FBLN5    | HBA2         | CTGF   | COL3A1 | APOE   | GJA1      | CT45A5 |
| 13   | THY1        | CTGF       | APOB      | FRZB                   | APOB   | COL6A3   | APOB         | FSTL1  | COL1A1 | CD34   | CDH5      | AHSP   |
| 14   | HOXA11      | APOB       | IGFBP5    | HBM                    | FSTL1  | HOXA4    | LCT          | LAMC1  | BGN    | FSTL1  | VCAM1     | APOB   |
| 15   | APOB        | PROM1      | GJA1      | SELENBP1               | APOE   | MYL4     | RHCE         | FBLN1  | FMOD   | FMOD   | APOB      | EPB42  |
| 16   | HBB         | HOXB4      | VCAM1     | PKLR                   | FBLN1  | SELENBP1 | HEMGN        | FMOD   | DCN    | LAMC1  | IGFBP5    | GJA1   |
| 17   | ATP1B2      | PTK2       | DCN       | CYSLTR2                | IGF2   | CCL1     | MYL4         | COL6A2 | FBLN1  | FBLN1  | PROM1     | COL3A1 |
| 18   | APBA1       | HBA1       | LAMC1     | THSD7A                 | FMOD   | HOXA6    | HBM          | APOE   | TIMP3  | IGF2   | COL3A1    | IGF2   |
| 19   | GTSF1       | HEMGN      | SDC1      | ADAMTS10               | TIMP3  | PLOD2    | C7           | VCAM1  | CTGF   | APOB   | SDC1      | ADCY2  |
| 20   | HOXB6       | GJA1       | CDH5      | TRH                    | LAMC1  | TIMP3    | SELENBP1     | APOB   | COL6A2 | TIMP3  | LAMC1     | CDH5   |
